RESEARCH ARTICLE

# Potential impacts of 2.3.4.4b highly pathogenic H5N1 avian influenza virus infection on Snow Goose (*Anser caerulescens*) movement ecology

Jeffery D. Sullivan<sup>1</sup>, Michael L. Casazza<sup>2</sup>, Rebecca L. Poulson<sup>3</sup>, Elliott L. Matchett<sup>2</sup>, Cory T. Overton<sup>2</sup>, Mike Carpenter<sup>2</sup>, Austen A. Lorenz<sup>2</sup>, Fiona McDuaie<sup>2</sup>, Michael Derico<sup>4</sup>, Elizabeth W. Howerth<sup>5</sup>, David E. Stallknecht<sup>3\*</sup>, Diann J. Prosser<sup>1\*</sup>

**1** U.S. Geological Survey, Eastern Ecological Science Center, Laurel, Maryland, United States of America, **2** U.S. Geological Survey, Western Ecological Research Center, Dixon Field Station, Dixon, California, United States of America, **3** Southeastern Cooperative Wildlife Disease Study, College of Veterinary Medicine, Department of Population Health, The University of Georgia, Athens, Georgia, United States of America, **4** U.S. Fish and Wildlife Service, Sacramento National Wildlife Refuge Complex, Willows, California, United States of America, **5** Department of Pathology, College of Veterinary Medicine, Department of Population Health, The University of Georgia, Athens, Georgia, United States of America

\* [dprosser@usgs.gov](mailto:dprosser@usgs.gov) (DSS); [dstall@uga.edu](mailto:dstall@uga.edu) (DJP)

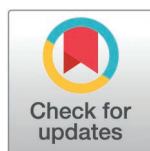

## OPEN ACCESS

**Citation:** Sullivan JD, Casazza ML, Poulson RL, Matchett EL, Overton CT, Carpenter M, et al. (2025) Potential impacts of 2.3.4.4b highly pathogenic H5N1 avian influenza virus infection on Snow Goose (*Anser caerulescens*) movement ecology. PLoS One 20(7): e0328149. <https://doi.org/10.1371/journal.pone.0328149>

**Editor:** Masahiro Kajihara, Hokkaido University: Hokkaido Daigaku, JAPAN

**Received:** March 4, 2025

**Accepted:** June 26, 2025

**Published:** July 28, 2025

**Copyright:** This is an open access article, free of all copyright, and may be freely reproduced, distributed, transmitted, modified, built upon, or otherwise used by anyone for any lawful purpose. The work is made available under the [Creative Commons CC0](https://creativecommons.org/licenses/by/4.0/) public domain dedication.

**Data availability statement:** Data relevant to this study are available from the USGS Science Data Catalog at <https://doi.org/10.5066/P13VCREZ>.

## Abstract

While wild waterfowl are known reservoirs of avian influenza viruses and facilitate the movement of these viruses, there are notable differences in the response to infection across species. This study explored differential responses to infection with highly pathogenic avian influenza in Snow Geese (*Anser caerulescens*) located in the California Central Valley. Though H5 antibody prevalence was high across years among birds sampled in the winter (75% in both years via hemagglutination inhibition), these values were even higher among birds sampled in summer that failed to migrate (i.e., August 2023 = 100% and August 2024 = 93% via hemagglutination inhibition). Birds that failed to migrate were also generally lighter than birds sampled in the winter and presented notable damage to cerebrum and cerebellum. In December 2022, a single individual positive for infection with H5N1 at the time of sampling indicated reduced movement during the 14 days following sampling but completed spring migration comparably with uninfected conspecifics. However, while no birds were actively infected during sampling and marking in 2023, two marked geese departed for migration late and one did not migrate at all. Additional banded birds marked in August have been reencountered in scenarios ranging from hunter harvest at a different site over a year later to found dead shortly after banding. Our data indicate that Snow Geese infected with HPAI have the potential to express variable outcomes following infection with highly pathogenic H5N1, ranging from rapid recovery within a migratory season to death. These data also suggest that the abnormal failure of some Snow Geese to migrate from the Central Valley is likely driven by HPAI infection.

**Funding:** This work was funded by the California Rice Commission (MC), the California Department of Water Resources (MC), Ducks Unlimited (MC), the California Department of Fish and Wildlife (MC), and the U.S. Geological Survey Ecosystems Mission Area (DJP). Partial funding was also provided by the National Institute of Allergy and Infectious Diseases, National Institutes of Health, Department of Health and Human Services, under contract 75N93021C00016 (DS). Funders played no role in the study design, data collection and analysis, decision to publish, or preparation of the manuscript.

**Competing interests:** The authors have declared that no competing interests exist.

## Introduction

Wild waterfowl are known reservoirs of avian influenza viruses (AIVs) and facilitate the movement of these viruses within a flyway [1,2], across flyways [3,4], and even between continents [5,6]. However, the potential for AIV dispersal can vary greatly by species susceptibility and behavior, migratory season, and virus strain. There are well documented differences in AIV infection prevalence between species, with dabbling ducks usually more likely to be infected than geese [7,8]. Similarly, challenge studies have indicated that susceptibility to infection, clinical signs of infection, and mortality all differ depending on viral strain and waterfowl species infected [9,10]. Differences in AIV infection prevalence in ducks also varies seasonally and is primarily associated with fall rather than spring migration [7,11].

Beyond differing prevalence rates and clinical responses, previous research has also indicated that infection with low pathogenic avian influenza (LPAI) can impact the movement ecology of wild waterfowl based on species. A study in California using telemetry to track waterfowl movement found that Northern Pintails (*Anas acuta*) and Canvasbacks (*Aythya valisineria*) infected with LPAI had significantly lower space use than non-infected individuals, but there was no difference between infected and non-infected Mallards (*Anas platyrhynchos*) [12] which aligns with similar observations in other work [13]. Similarly, species such as Bewick's Swan (*Cygnus columbianus*) [14] and Canvasback that experienced LPAI infection delayed migration the following season, no such impact was observed with Northern Pintail [12] or Mallards [13]. Though antibodies conferred by surviving previous infection appear to modulate the impacts of recurrent infection even in wild settings [15].

While there are few studies that explore the impact of LPAI infection on movement and migration, even less is known about the impacts of highly pathogenic avian influenza (HPAI) infection on wild waterfowl outside of a laboratory setting. A study on Mallards from Tennessee, USA found that 11 Mallards infected with HPAI H5N1 clade 2.3.4.4b had no clear differences in local or migratory movement compared to non-infected conspecifics [16]. Similarly, a single White-faced Whistling Duck (*Dendrocygna viduata*) marked in Nigeria [17] and five Spot-billed Ducks (*Anas poecilorhyncha*) in South Korea [18] were found to complete migration following HPAI infection. Conversely, a single Lesser Scaup (*Aythya affinis*) from Maryland, USA, expressed restricted local movements compared to non-infected birds but died three days following marking [19]. Given this paucity of information regarding how HPAI infection influences the movements of wild birds, obtaining telemetry data across as many species as could support the improvement of transmission risk models and the ability to adequately predict the potential implications of HPAI outbreaks on agriculture and wild bird populations.

During a telemetry study focused on the migratory ecology of Snow Geese in the California Central Valley, a single goose tested positive for infection with HPAI, allowing for the opportunity to follow this bird through the migratory period and compare behaviors to those of uninfected conspecifics. Additionally, following this initial detection, many geese, including some marked as part of the telemetry study, either departed for migration after a severe delay or failed to migrate from the wintering grounds

altogether, behavior which had not previously been observed. Given the noted susceptibility of Snow Geese to HPAI in both laboratory studies [20] and wild mortality events [21,22] we sought to improve our understanding of infection outcomes in this species. Our objectives were to (1) characterize the movement of the infected individual relative to non-infected conspecifics marked on the same day and (2) to characterize movements of observed non-migrants and determine if they were or had been infected with highly pathogenic H5N1 or had pathological changes that may have affected their ability to migrate.

## Materials and methods

### Capture, sampling, and marking

**Apparently healthy birds for telemetry study.** On 15 December 2022 and 7 March 2024 we captured Snow Geese, a species known to migrate between North America and Eurasia (more general ecology information available from [23]), on the Delevan National Wildlife Refuge (NWR), Colusa County, California (39.308°, -122.097°) using rocket nets [24]. All birds appeared healthy at the time of processing, with no apparent displays of illness or infection typical of waterfowl infected with HPAI [25]. Upon capture, geese were placed into large holding containers and kept out of direct sunlight until they could be processed. Birds were individually banded with U.S. Geological Survey, Bird Banding Laboratory metal bands and data on age and sex were recorded. A subset of birds was then selected (preference for adult females in 2022/23, no preference in 2023/24) for fitting with a transmitter. Selected individuals were marked with Ornitrack-N38 (inner diameter: 38 mm, outer diameter: 46–61 mm; 38g) or Ornitrack-N44 telemetry collars (inner diameter: 44 mm, outer diameter: 53–68 mm; 45g). Collars were programmed to collect locational fixes every 15 minutes.

In addition to banding and marking, a cloacal and oropharyngeal swab [26] were collected from each bird using sterile polyester-tipped applicators and placed as paired samples (by bird) in vials containing 2 mL of cold virus transport medium (VTM) with the composition previously reported [19]. Swabs were stored on ice for <12 hours following collection and were shipped on ice to the laboratory and held at -80°C until processing. Additionally, up to 3 mL of blood was taken from the jugular vein (of birds not marked with transmitters in 2022 and all birds in 2024). Blood was placed in a BD Vacutainer SST (BD, Franklin Lakes, New Jersey, USA) and stored on ice for <12 hours. Blood samples were centrifuged for 20 minutes at 2500 rpm to separate serum.

Appropriate ethical review committee approval was received prior to the capture, sampling, and marking of any birds (USGS EESC ACUC 2022-11P; USGS WERC ACUC Review; and Federal banding permit #21142). All sampling of healthy birds required no use of anesthesia and was conducted as quickly as possible to reduce handling stress.

**Sampling birds that failed to migrate.** Over the summers of 2023 and 2024, flocks of ~200 and ~1000 Snow Geese, respectively, uncharacteristically continued to reside on wetland ponds of the Sacramento NWR (39.418° N, 122.160° W), despite conspecifics initiating migration to breeding areas by late-March through mid-April (see Results). All remaining individuals appeared visually emaciated (exposed keel). A similar situation was observed in Yolo Bypass Wildlife Area (38.562° N, 121.629° W) when a flock of 120 Snow Geese failed to migrate in the summer of 2024. Thus, on 22 August 2023 and 8 August 2024, in an effort to assess potential causes for this behavior, we captured Snow Geese from the Sacramento NWR at night using an airboat and spotlighting techniques [27]. Similarly, Snow Geese were captured on 28 June 2024 at the Yolo Bypass Wildlife Area with rocket nets [28]. We collected swab and blood samples following the methods described above. In addition, two geese were collected via shotgun (i.e., immediate lethality, no anesthesia required) each summer (2023 from Sacramento NWR, 2024 from Yolo Bypass Wildlife Area) for necropsy evaluation at the Southeastern Cooperative Wildlife Disease Study. Carcasses were stored under refrigeration for six days prior to necropsy.

### Laboratory testing

For IAV detection, we extracted viral RNA from swab samples using the MagMAX-96 AI/ND Viral RNA Isolation Kit (Ambion/Applied Biosystems, Foster City, CA) and tested using real-time reverse transcriptase-PCR (rRT-PCR) targeting

the IAV matrix (M) gene [29] Nucleic acids were also screened against primers specific for 2.3.4.4b H5 IAV in rRT-PCR; samples that yielded a cycle threshold value <40 were submitted to USDA National Veterinary Services Laboratory for official confirmation of subtype and pathogenicity following previously described methods [30]. IAV laboratory testing was completed after captured birds were released; hence, the infection status was not known at time of release.

For serology, serum samples were initially tested using a commercial blocking enzyme-linked immunosorbent assay (bELISA, IDEXX Laboratories, Westbrook, ME) for influenza A virus antibodies as described by the manufacturer. A serum-to-negative control (S/N) absorbance ratio <0.7 was used as a positive cutoff threshold [31–33]. However, since manufacturer recommendations indicate a cutoff of <0.5, we also report results using this value. All sera testing positive on bELISA were further tested for antibodies to H5 by hemagglutination inhibition (HI) and virus microneutralization (VN) as described by [34,35]. For both HI and VN H5 testing, two reverse genetics (rg) constructs were used as antigens. These included a low pathogenic virus with HA and NA from A/blue-winged teal/Texas/AI12–4150/2012 (H5N2) and remaining genes from A/Puerto Rico/8/1934 (PR8; H1N1) (this combination of low pathogenic H5 on the PR8 backbone is hereafter referred to as BWT). The clade 2.3.4.4b representative antigen [IDCDC-RG71A (H5N8)] consisted of HA and NA from A/Astrakhan/3212/2020 (H5N8) and remaining genes from PR8 (hereafter referred to as AST); the HA contains a modified protease cleavage site characteristic of low pathogenic IAV. Sera were also assessed for antibodies N1 using an enzyme-linked lectin assay (ELLA) as previously described, with A/ruddy turnstone/New Jersey/AI13–2948/2013(H10N1) used as antigen [34]. Positive threshold titers for HI, VN, and ELLA were 8, 20, and 80, respectively. For geometric mean titer (GMT) calculations, performed in the R statistical platform [36], antibody titers of <8 and  $\geq 1024$  (HI) and <20 and  $\geq 2560$  (VN) were transformed as 4 and 1024 for HI and 10 and 2560 for VN [37].

**Pathology.** In addition to serologic testing, four nonmigrating geese were euthanized in August 2023 and July 2024. Euthanized individuals were randomly selected from the population. Cloacal and choanal swabs were collected and tested for influenza A by PCR. In addition, brain swabs and tissue were collected from the two 2024 birds for influenza PCR, as well as serum for influenza bELISA. Brains from the 2023 birds and heads, with calvarium removed, from the two 2024 birds were fixed in 10% buffered formalin. Heads were subsequently decalcified for further processing. Tissues from the four birds were routinely processed and embedded in paraffin and 4 micron sections were stained with hematoxylin and eosin (HE). Immunohistochemical staining for influenza A nucleoprotein and glial fibrillar acidic protein (GFAP; [S1 Table](#)) was performed on serial 4 m sections on an automated stainer (intelliPATH, Biocare).

## Movement data processing and analysis

Prior to analysis, telemetry data were reviewed to ensure all fixes were from live birds (i.e., removed fixes from dead birds or lost transmitters). The 2022/23 dataset was further reduced to include only females (only one marked male in this dataset) while the 2023/24 dataset was not subset by age or sex. After filtering, we characterized local movements of each marked bird with complete data during the 14 days following marking (beginning the day after release). We focused on the first fourteen days following release (beginning the day after release) as this is the window traditionally used to represent the infectious period of HPAI infected waterfowl [19,38]. While infectious period can vary dramatically between species [39,40], the use of a broader window allows further certainty that any unusual behaviors during the actual infectious period would be captured. We calculated two metrics to assess local movements: the daily distance moved and the daily minimum convex polygon (MCP) area. Daily distance moved was calculated by finding the distance between each consecutive locational fix within a calendar day and summing this distance for each individual with at least 72 fixes (75% of possible fixes within a given day). Distance between fixes was calculated within R Studio [41] using the `distHaversine` function [42]. Daily MCP area was found by using the “`mcp`” function [43] to generate shapefiles of the 100% daily MCP, and the area of these shapefiles was calculated in ArcMap 10.8.1 [44].

In addition to characterizing local movements, we also identified contact events between the marked infected bird and other marked birds during this initial 14-day window. A contact event was defined as any fix within 25 m and 15 min of a fix



from the infected individual [19]. These buffers were used since individual transmitters were turned on at different times, depending on time of marking, hence although all transmitters are set to the same fix cycle, the fixes are not taken at the same time.

Finally, we sought to characterize migratory movements of all individuals for which a full migratory track was available via three metrics: migration initiation date, migration end date, and total migration duration. Migration initiation was identified by manually reviewing data and locating the first fix representing sustained movement away from the wintering grounds [45]. Similarly, migration end date was selected as the first point from which there were repeated locational fixes with limited displacement during the breeding period [46]. Migration duration was calculated as the number of whole days from migration initiation to migration end date. To ensure comparability in migration metrics we separated individuals based upon not only infection status (2023 birds) or migration timing (2024 birds), but also final migratory end point.

Data supporting all results in this manuscript are available from [47].

## Results

### Apparently healthy birds

A total of 66 apparently healthy Snow Geese were captured and sampled on 15 December 2022 and 7 March 2024, with laboratory processing detecting only two active infections with AIV, both of which were HPAI infections from the December 2022 sampling event (Table 1). However, no isolates or sequences were obtained from these positive samples. Conversely, antibody prevalence was high across both sampling years, with at least 75% of birds in each year positive at the S/N < 0.7 threshold and more than 75 and 63% of birds in each year possessing H5 antibodies as detected via HI and VN, respectively (Table 2).

In 2023, a total of 30 marked individuals (29 non-infected, 1 infected) transmitted data for the duration of the first 14 days following capture, sampling, and release. During this initial window non-infected Snow Geese had average daily movement distances ranging from 7448–45384 m, while the lone infected bird had daily movements ranging from 3434–35240 m and an average daily movement distance of 8910 m, placing it at the 10<sup>th</sup> percentile (Fig 1). A similar trend was observed with daily MCP area, which ranged from < 1–1189 km<sup>2</sup> among non-infected birds, with an average of 40.5 km<sup>2</sup>. However, the single infected bird had a daily MCP ranging from < 1–48.1 km<sup>2</sup> with an average of 5.74 km<sup>2</sup>, placing it in the 13<sup>th</sup> percentile. We observed a total of 21 contacts between the infected bird and 12 unique non-infected birds, ranging from a single fix to 12 hours of continued proximity.

In 2023, a total of 19 individuals (18 non-infected, 1 infected) transmitted data through spring migration. Snow Geese migrated primarily to Wrangel Island (Russia) and Banks Island (Canada), with the infected bird migrating to Banks Island in the Canadian portion of the Arctic Archipelago. When compared only to individuals migrating to the same breeding site, the infected bird was in the 36<sup>th</sup> percentile for migration initiation date, 27<sup>th</sup> percentile for arrival date, and 36<sup>th</sup> percentile for migration duration (Table 3). While there may be minor differences in the migration timing and duration between sites, Snow Geese, including the infected bird, appeared to take the same general migratory route until reaching stopover sites in southern Alberta, Canada (Fig 2).

### Delayed and non-migrants

An additional 56 samples were collected on 22 August 2023, 28 June 2024, and 8 August 2024 from Snow Geese that failed to migrate during normal timelines. For birds sampled on the Delevan and Sacramento NWRs, body weight was notably higher in early sampled birds than in late sampled birds (Table 1). However, birds sampled at Yolo Bypass Wildlife Area had higher masses than other birds that failed to migrate, though qualitative visual observations indicated that these birds appeared to lose mass over time and behaved unusually. For instance, when the rocket net was fired, an event causing considerable noise and disruption, individuals beyond the range of the net swam slowly away instead of flying despite capture occurring among flight-capable individuals and prior to wing molt.

**Table 1. Prevalence (representing active infection) of influenza A virus for wild Snow Geese (*Anser caerulescens*) sampled on wintering areas at Delevan and Sacramento National Wildlife Refuges and Yolo Bypass Wildlife Area in California, USA. Prevalence identified using 2.3.4.4 HP H5 rRT-PCR (M+, Ct values ≤ 40).**

| Sampling Date | Location       | Health Status      | Age        | Sex | Weight (g) <sup>*</sup> |           | Active Infection |           |
|---------------|----------------|--------------------|------------|-----|-------------------------|-----------|------------------|-----------|
|               |                |                    |            |     | n                       | $\bar{x}$ | n                | H5 + Prev |
| 12/15/2022    | Delevan NWR    | Apparently Healthy | Cumulative |     | 50                      | 2155.3    | 50               | 4%        |
|               |                |                    | AHY        | M   | 11                      | 2298.7    | 11               | 0%        |
|               |                |                    | AHY        | F   | 33                      | 2147.5    | 33               | 3%*       |
|               |                |                    | HY         | M   | 4                       | 2015.5    | 4                | 0%        |
|               |                |                    | HY         | F   | 2                       | 1774.0    | 2                | 50%       |
| 8/22/2023     | Sacramento NWR | Non-Migrants       | Cumulative |     | 27                      | 1638.5    | 27               | 0%        |
|               |                |                    | ASY        | M   | 15                      | 1680.7    | 15               | 0%**      |
|               |                |                    | ASY        | F   | 5                       | 1627.8    | 5                | 0%        |
|               |                |                    | SY         | M   | 3                       | 1508.0    | 3                | 0%        |
|               |                |                    | SY         | F   | 4                       | 1591.5    | 4                | 0%        |
| 3/7/2024      | Delevan NWR    | Apparently Healthy | Cumulative |     | 16                      | 1903.5    | 16               | 0%        |
|               |                |                    | ASY        | M   | 3                       | 2093.3    | 3                | 0%        |
|               |                |                    | ASY        | F   | 1                       | 1736.0    | 1                | 0%        |
|               |                |                    | SY         | M   | 4                       | 2006.0    | 4                | 0%*       |
|               |                |                    | SY         | F   | 8                       | 1802.0    | 8                | 0%**      |
| 6/28/2024     | Yolo Bypass    | Non-Migrants       | Cumulative |     | 14                      | 2074.9    | 14               | 0%        |
|               |                |                    | ASY        | M   | 8                       | 2091.0    | 8                | 0%        |
|               |                |                    | ASY        | F   | 6                       | 2053.5    | 6                | 0%        |
| 8/8/2024      | Sacramento NWR | Non-Migrants       | Cumulative |     | 15                      | 1513.3    | 15               | 0%        |
|               |                |                    | ASY        | M   | 5                       | 1439.2    | 5                | 0%**      |
|               |                |                    | ASY        | F   | 10                      | 1550.4    | 10               | 0%        |

<sup>\*</sup>All birds were measured to the nearest gram except for individuals captured at the Yolo Area Wildlife Bypass on 6/28/2024 which could only be measured up to 2100 g. Any birds over 2100 g were treated as 2100 g for this analysis.

<sup>\*</sup>Includes the single infected transmittered bird

<sup>\*\*</sup>Includes a single individual that initially tested positive via PCR but which was not confirmed by NVSL

<sup>\*</sup>Includes two individuals that initiated migration later than normal for this species.

<sup>\*\*</sup>Includes one individual that never departed on spring migration.

<https://doi.org/10.1371/journal.pone.0328149.t001>

While we detected only a single active infection from these individuals (Table 1), the rate of prior infections was slightly higher among the birds in flocks that did not migrate at normal times of year than for the apparently healthy birds (Table 2). For instance, every individual sampled at the Sacramento NWR in August 2023 tested positive for antibodies to influenza A virus compared to 88% in December. Cumulative results from subtyping of previous infections with both HI and VN indicated 26 of 32 apparently healthy birds, and all but one individual that failed to migrate by August showed antibodies to H5 and N1. The high antibody levels for AST relative to BWT for individuals that failed to migrate indicate likely previous infection with highly pathogenic H5N1, such levels were much more comparable in the birds sampled while apparently healthy.

Cloacal, choanal, and brain samples collected from the four nonmigrating birds tested negative for influenza A by PCR. Brain tissue from all birds also tested negative for influenza A by immunohistochemistry. Both birds sampled in 2024 tested positive for antibodies to AIV, H5, and N1. Serum was not available for the birds collected 2023. All birds had multiple asymmetric foci of astrogliosis detected by immunohistochemistry for GFAP in both cerebrum and cerebellum, which is a reactive change to previous damage. On HE stained sections, these foci corresponded to mild neuroparenchymal

**Table 2.** Detection of antibodies to influenza A virus (bELISA) as well as H5 (Hemagglutination inhibition and Virus neutralization with cutoffs of  $\geq 8$  and  $\geq 20$ , respectively) and N1 (Enzyme-linked lectin assay, cutoff  $\geq 80$ ) specifically in wild Snow Geese (*Anser caerulescens*) sampled on wintering areas at Delevan (sampled 12/15/2022 and 3/7/2004) and Sacramento National Wildlife Refuges (8/22/2023 and 8/8/2024) and Yolo Bypass Wildlife Area (6/28/2024) in California, USA. When including any values with a numeric operator in calculating a geometric mean the next closest dilution value was used (i.e.,  $< 8$  became 4 but  $\geq 2560$  became 2560).

| Sampling Date | n  | bELISA                    |                           | Hemagglutination inhibition    |            |                                |            | Virus neutralization           |            |                                |            | Enzyme-linked lectin assay      |            |
|---------------|----|---------------------------|---------------------------|--------------------------------|------------|--------------------------------|------------|--------------------------------|------------|--------------------------------|------------|---------------------------------|------------|
|               |    | % Positive (S/N $< 0.5$ ) | % Positive (S/N $< 0.7$ ) | AST log <sub>2</sub> $\bar{x}$ | % Positive | BWT log <sub>2</sub> $\bar{x}$ | % Positive | AST log <sub>2</sub> $\bar{x}$ | % Positive | BWT log <sub>2</sub> $\bar{x}$ | % Positive | ELLA log <sub>2</sub> $\bar{x}$ | % Positive |
| 12/15/2022    | 16 | 75%                       | 88%                       | 3.69                           | 75%        | 3.44                           | 38%        | 6.26                           | 63%        | 5.26                           | 56%        | 8.38                            | 75%        |
| 8/22/2023     | 27 | 96%                       | 100%                      | 5.07                           | 100%       | 3.89                           | 85%        | 8.84                           | 100%       | 5.21                           | 70%        | 10.40                           | 100%       |
| 3/7/2024      | 16 | 75%                       | 75%                       | 4.38                           | 75%        | 3.25                           | 44%        | 7.88                           | 69%        | 4.63                           | 50%        | 8.20                            | 75%        |
| 6/28/2024     | 14 | 57%                       | 86%                       | 4.00                           | 93%        | 2.21                           | 21%        | 9.61                           | 100%       | 4.11                           | 56%        | 9.61                            | 100%       |
| 8/8/2024      | 14 | 93%                       | 93%                       | 4.50                           | 86%        | 3.57                           | 71%        | 7.75                           | 86%        | 3.68                           | 21%        | 8.61                            | 93%        |

<https://doi.org/10.1371/journal.pone.0328149.t002>

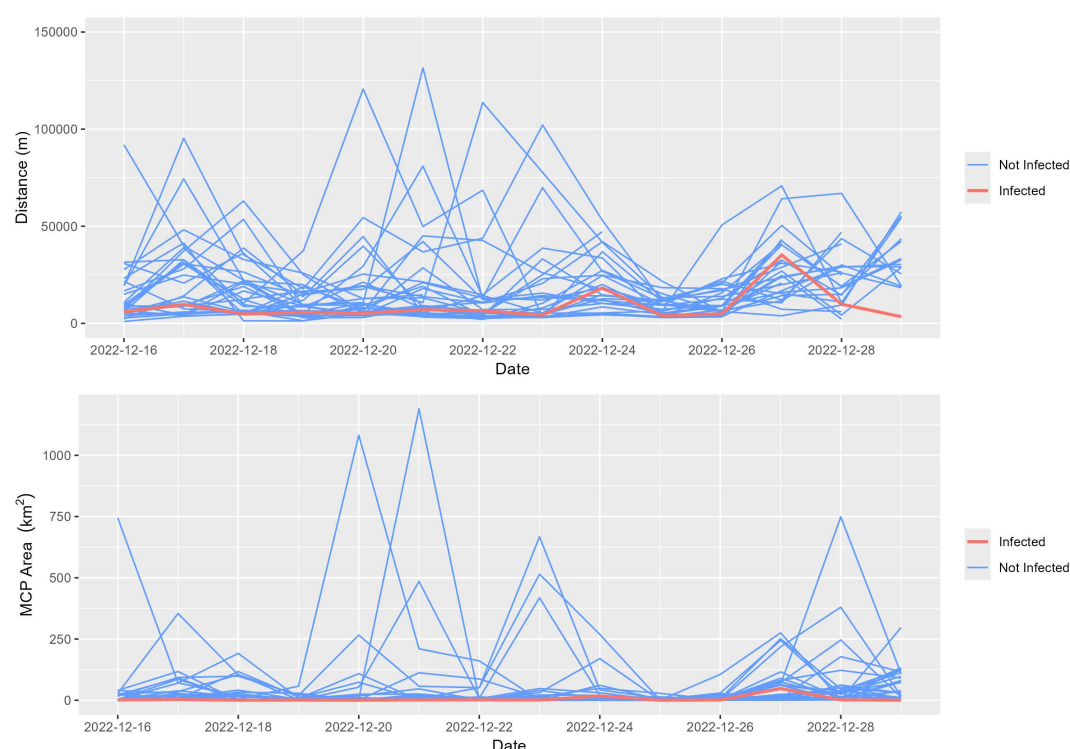

**Fig 1.** Daily distance moved and daily minimum convex polygon (MCP) area for Snow Geese (*Anser caerulescens*) marked with GPS-GSM transmitters on a wintering area at Delevan National Wildlife Refuge (California, USA) on 15 Dec 2022. Daily distance moved was calculated by finding the distance between each consecutive locational fix within a calendar day and summing this distance for each individual with at least 72 fixes (75% of possible fixes within a given day). The red line represents data from a single Snow Goose that was later revealed to have been naturally infected with HPAI and shedding virus at the time of marking.

<https://doi.org/10.1371/journal.pone.0328149.g001>

vacuolation, loss of neurons, and prominent capillaries in the cerebrum (Fig 3) and more severe changes in the cerebellum involving one or more folia. Affected folia had thinning and rarefaction of the molecular layer, decreased neuronal cellularity of the internal granular layer and vacuolation of the associated foliar white matter (Fig 4). We presume these

**Table 3. Average spring migration initiation and arrival dates on breeding grounds for Snow Geese (*Anser caerulescens*) marked with GPS-GSM transmitters on wintering areas at Delevan National Wildlife Refuge (California, USA) on 15 Dec 2022 and 7 Mar 2024 based on IAV infection status from testing conducted at the time of marking and migration initiation dates, respectively. All birds marked in 2024 were negative for active infection with IAV at the time of marking. Brackets indicate the minimum and maximum values observed in a category.**

| Year | Bird Status    | Migration Endpoint    | n  | Initiation Date       | End Date             | Duration (days) |
|------|----------------|-----------------------|----|-----------------------|----------------------|-----------------|
| 2023 | Infected       | Banks Island          | 1  | 3/17/2023             | 5/29/2023            | 73              |
|      | Not Infected   | Banks Island          | 10 | 3/19/2023 [3/03-4/04] | 5/30/2023 [5/28-6/4] | 73 [55-89]      |
|      | Not Infected   | Wrangel Island        | 6  | 3/22/2023 [3/7-3/31]  | 5/27/2023 [5/21-6/1] | 66 [55-86]      |
|      | Not Infected   | Leningradsky          | 1  | 4/17/2023             | 6/6/2023             | 50              |
|      | Not Infected   | Peard Bay             | 1  | 3/7/2023              | 5/24/2023            | 78              |
| 2024 | Normal Migrant | Banks Island          | 7  | 4/5/2024 [3/25-4/26]  | 5/31/2024 [5/27-6/9] | 57 [44-66]      |
|      | Late Migrant   | Banks Island          | 1  | 5/12/2024             | 6/8/2024             | 27              |
|      | Normal Migrant | Prince Alberts Island | 1  | 4/24/2024             | 5/30/2024            | 36              |
|      | Late Migrant   | Prince Alberts Island | 1  | 5/26/2024             | 6/8/2024             | 13              |
|      | Normal Migrant | Wrangel Island        | 1  | 3/28/2024             | 5/29/2024            | 63              |
|      | Normal Migrant | Peard Bay             | 1  | 4/9/2024              | 5/31/2024            | 52              |

<https://doi.org/10.1371/journal.pone.0328149.t003>

changes to be the result of previous infection with influenza as these changes mirror the typical immunohistologic distribution of influenza virus antigen we previously observed in acutely infected snow geese.

In 2024, a total of 16 individuals (13 normal migrants, 2 late migrants, and 1 non-migrant) transmitted data for the duration of the first 14 days following capture, sampling, and release. During this initial window, average daily movement distances ranged from 9699–57578 m and from 11692–12393 m for normal migrants and late migrants, respectively. The non-migrant bird had daily movement distances ranging from 6204–21266 m. Average daily movement distances were 21763 m, 12042 m, and 10126 m (Fig 5) for normal migrants, late migrants, and the non-migrant, respectively. A similar trend was observed with daily MCP area (Fig 5). Interestingly, there have been 6 reported reencounters of the birds sampled and banded in Sacramento NWR on 22 August 2023 that failed to migrate within the traditional window for this species. Three individuals were found freshly dead on the Sacramento NWR (two encountered on 11 September 2023, and one encountered 14 November 2023) with a fourth found as skeletal remains on 24 February 2024. However, two individuals were later reencountered via hunter harvest, with the first bird harvested near Colusa, California (~23 km from banding location) on 15 December 2023 and the second near Stockton, California (~175 km from banding location) on 26 October 2024.

In 2024, a total of 12 individuals transmitted data through spring migration. As observed in 2023, Snow Geese primarily migrated to Banks Island, though birds were also observed migrating to Wrangel Island, and Peard Bay (Table 3). However, we also observed birds (marked as hatch year so second year at time of migration) that migrated directly to molting grounds in eastern Banks Island by traveling through Alberts Island. The two late migrants appeared to follow routes similar to those used by other birds that departed for migration at traditional times (Fig 6). It should be noted that comparisons between 2023 and 2024 should be limited due to differences in sex and age of marked individuals (i.e., 2023 included only adult females while 2024 included males and hatch year birds) as well as anecdotal reports of heavy snow on the breeding grounds and compact dense late-season sea-ice near Wrangel Island [48] which is indicative of weather conditions that limit nesting attempts.

## Discussion

Our data indicate that Snow Geese infected with HPAI have the potential to express variable outcomes, ranging from rapid recovery within a migratory season to death. For instance, one telemetry marked bird that was infected with HP H5N1 completed a normal migration while other individuals that had previously been infected with HP H5N1 based on



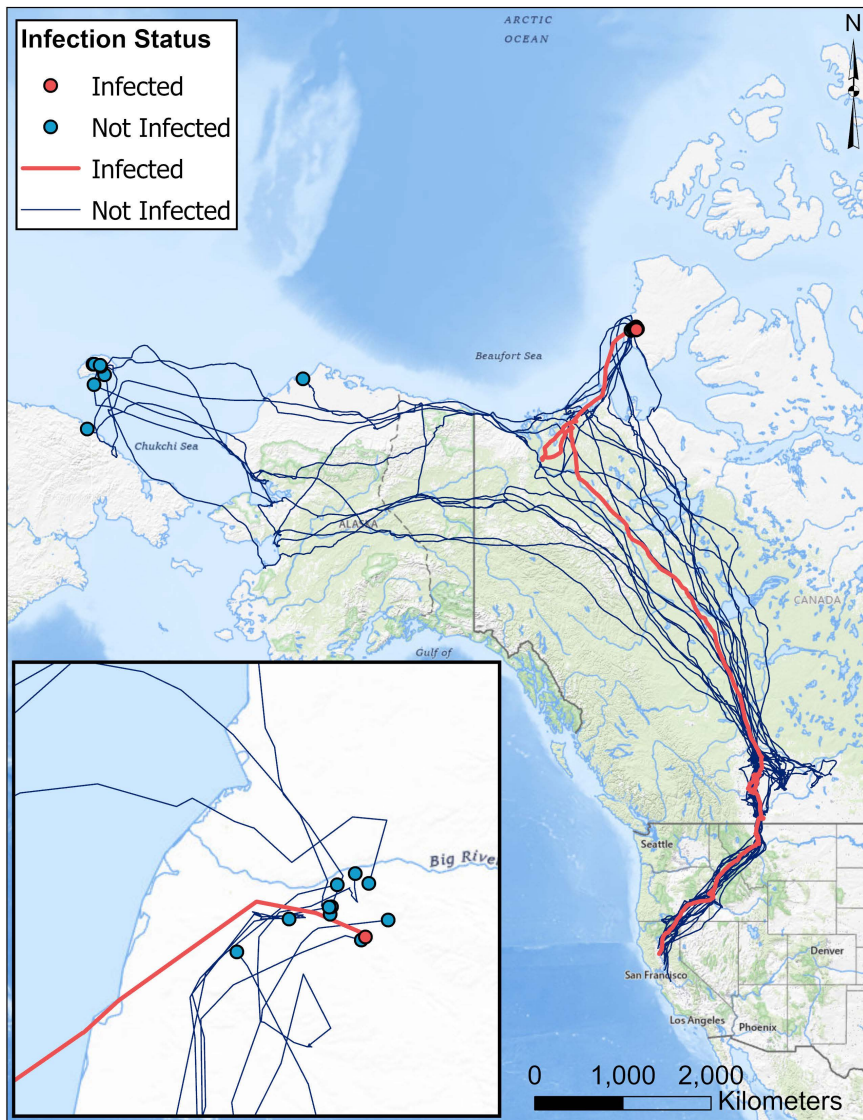

**Fig 2. Spring migratory paths for Snow Geese (*Anser caerulescens*) marked with GPS-GSM transmitters on a wintering area at Delevan National Wildlife Refuge (California, USA) on 15 Dec 2022.** Lines indicate migratory pathways while dots indicate the first location at the likely breeding site. The inset map shows the proximity of the identified likely breeding site of a single Snow Goose that was later revealed to have been infected with HPAI at the time of marking (red) relative to individuals that test negative for HPAI (blue). Basemaps are taken from the USGS National Map.

<https://doi.org/10.1371/journal.pone.0328149.g002>

serologic results suffered delayed migration or did not migrate at all. The long-term outcome of these nonmigrating geese is not currently clear. While some local mortality was observed, a single bird believed not to have migrated in 2023 was harvested approximately 16 months later 175 kilometers away from the point of capture. The differences in the response to HP H5N1 infection observed between Snow Geese may have been driven by a variety of factors including preexisting immunity to LP AIV [49] which is known to circulate in wild Snow Geese [7,50], variations in the specific HPAI genotype [51], differential exposure to contaminants [52] or other factors that would weaken immune response. Additional research could support parsing out these complex inter-relations.

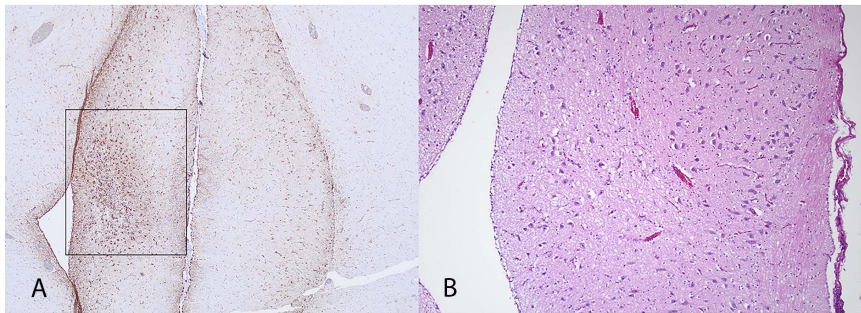

**Fig 3. Unilateral focus of damage in the septum pellucidum of one of the 2023 snow geese.** **A)** GFAP immunohistochemistry. Note the large amount of dark brown staining in the black box which indicates increased numbers of astocytes (astrogliosis) as opposed to the opposite side. DAB chromogen. **B)** HE staining of the same focus characterized by mild vacuolation, loss of neurons, and prominent capillaries lined by plump endothelium.

<https://doi.org/10.1371/journal.pone.0328149.g003>

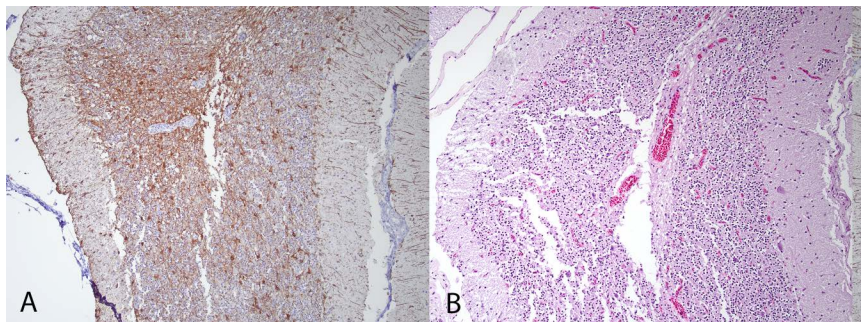

**Fig 4. Cerebellar folium of one of the 2024 geese.** **A)** GFAP immunohistochemistry. Severe astrogliosis characterized by the large amount of brown staining in the molecular layer and internal granular. DAB chromogen. **B)** HE staining of the same folium. The molecular layer is thin and rarified with decreased Purkinje cells and internal granular layer neurons.

<https://doi.org/10.1371/journal.pone.0328149.g004>

The recovery and completion of subsequent migration by a Snow Goose infected with HPAI reported here is comparable to other species such as Mallards [16], White-faced Whistling Duck [17] and Spot-billed Ducks [18], which have all been observed to successfully migrate following HPAI infection. While sample size is limited for this observation, and the majority of previous similar reported instances, it does provide further insight into the long-term impacts of HPAI infection on at least some members of these populations that can be used to inform more complex modeling efforts [53]. Notably, the infected individual also followed the same migratory route to reach a stopover habitat in southern Alberta as all other marked birds in this study did, regardless of their migratory endpoint. Thus, there appears to be potential for relay transmission of infections on wintering grounds to reach different breeding grounds [54].

While the single actively HPAI-infected Snow Goose marked with a transmitter appeared to have comparable migratory ecology with non-infected conspecifics, this does not mean the infected individual did not express any impacts from infection. Instead, the infected Snow Goose had notably lower daily movements and overall space use compared to non-infected geese. This supports similar observations with species such as Northern Pintail and Canvasbacks which showed decreased space use during the period of active infection with LPAI [12]. Response to infection does appear highly species-specific as Mallards showed no such response to HPAI infection [16].

While infection with HPAI appears to have had no or limited impact on the migration of one tracked bird, the same cannot be said for the Snow Geese sampled in August which were visibly emaciated and failed to leave this wintering site for spring migration. While we cannot say for certain that the brain lesions observed in these individuals were caused by the

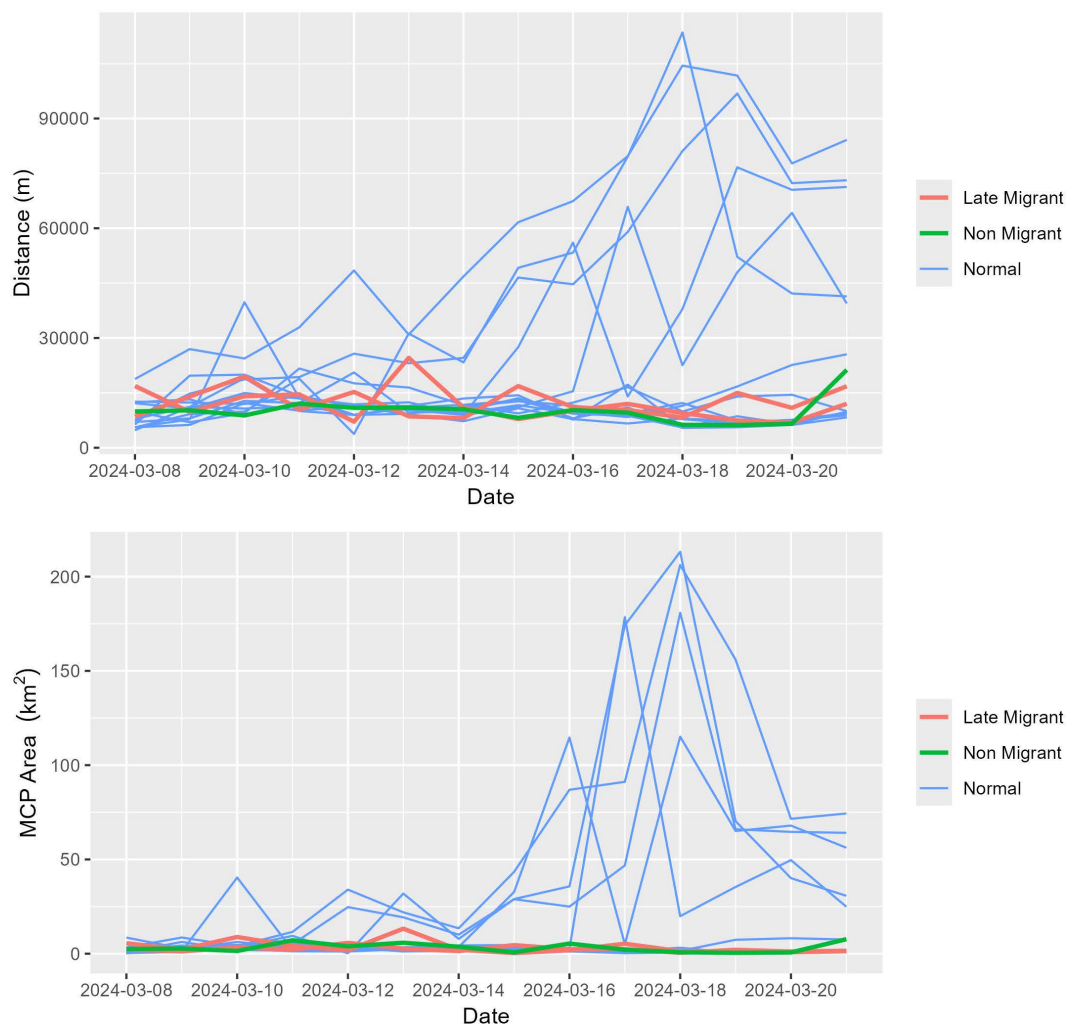

**Fig 5. Daily distance moved and daily minimum convex polygon (MCP) area for Snow Geese (*Anser caerulescens*) marked with GPS-GSM transmitters on a wintering area at Delevan National Wildlife Refuge (California, USA) on 7 March 2024.** Daily distance moved was calculated by finding the distance between each consecutive locational fix within a calendar day and summing this distance for each individual with at least 72 fixes (75% of possible fixes within a given day).

<https://doi.org/10.1371/journal.pone.0328149.g005>

H5N1 infections, this does appear likely and has been reported in other species [55,56]. Similarly, weight loss is commonly associated with AIV infection in both challenge studies and wild waterfowl [49,57,58]. However, there is some dispute whether low body weight in infected wild waterfowl is a result of infection or just correlated with birds in poor condition that were already at high risk of infection [59,60]. It is possible that the low body weight observed in the non-migrating birds could also have resulted from behavior changes associated with brain injury occurring during previous H5N1 infection. Still, the tagging of three individuals that were already seropositive and later failed to migrate at normal times suggests that whatever response to infection led to this altered behavior built over time, as birds appeared healthy at the time of marking.

The data described in this manuscript provide unique insight into the impacts of H5N1 infection on wild Snow Geese. The observed range in responses from reduced localized movement followed by apparent recovery and successful migration to long-term impacts resulting in a missed breeding season also demonstrates a knowledge gap in the available



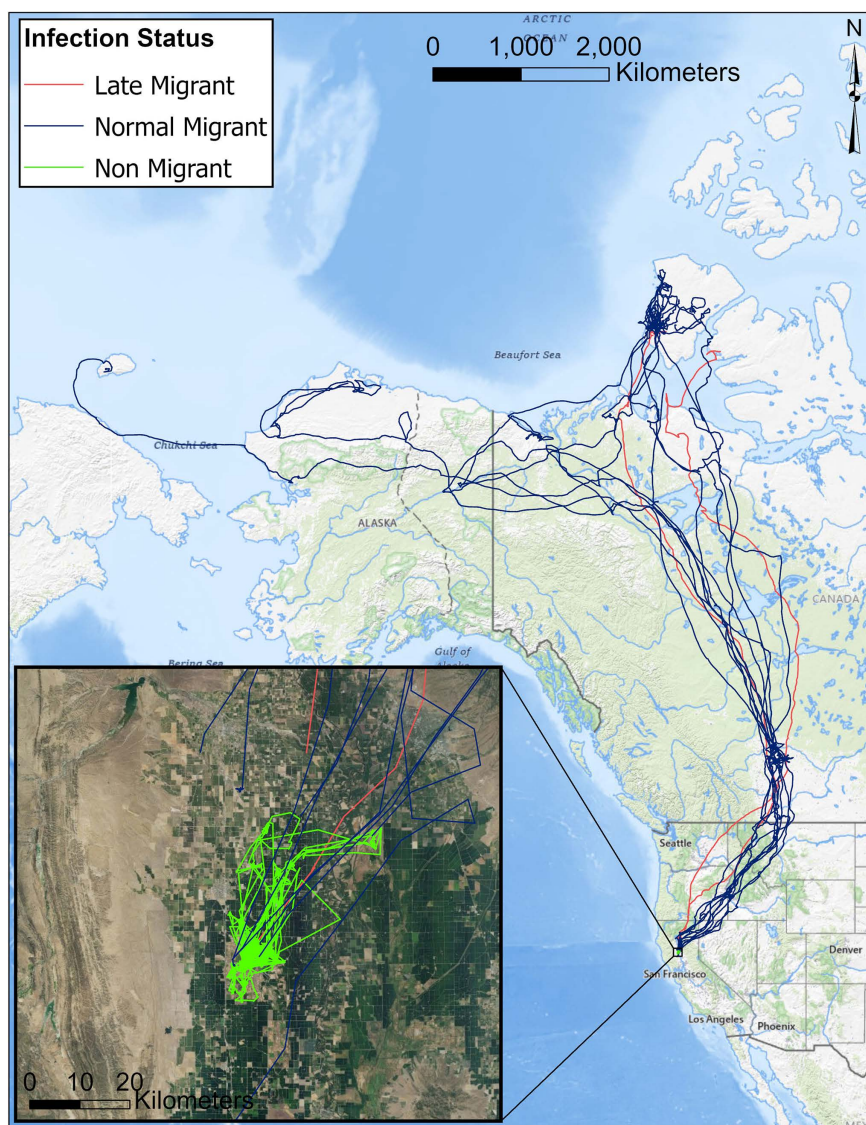

**Fig 6. Spring migratory paths for Snow Geese (*Anser caerulescens*) marked with GPS-GSM transmitters on a wintering area at Delevan National Wildlife Refuge (California, USA) on 7 Mar 2024.** Lines indicate all movements from the initiation of migration through 15 June 2024 for all birds that migrated during a normal migratory window (blue), and those that migrated with a late departure (red). All movements from marking through 15 June 2024 for the non-migrating bird are shown in the inset map (green). Basemaps are taken from the USGS National Map.

<https://doi.org/10.1371/journal.pone.0328149.g006>

literature surrounding how individual species respond to infection and the factors that drive individual infection outcomes. While our sample size of tracked infected birds is insufficient for more detailed analysis, these results still provide useful insight and help to demonstrate the value of pairing disease sampling with ecology-focused animal movement studies.

## Supporting information

**S1 Table. Antibodies with host, source, retrieval information, and dilution.**  
(DOCX)

## Acknowledgments

We thank the staff at the Sacramento National Wildlife Refuge Complex and Yolo Wildlife Area for their assistance with logistics and field captures. We thank Andrea Mott, Jacob Chappell and Desmond Mackell for their help with capture, bird marking, and field data collection as well as Deborah Carter and Lyndon Sullivan Brügger for laboratory support. Any use of trade, firm, or product names is for descriptive purposes only and does not imply endorsement by the U.S. Government.

## Author contributions

**Conceptualization:** Jeffery D. Sullivan, Michael L. Casazza, David E. Stallknecht, Diann J. Prosser.

**Data curation:** Jeffery D. Sullivan, Rebecca L. Poulson, Cory T. Overton, David E. Stallknecht.

**Formal analysis:** Jeffery D. Sullivan, Rebecca L. Poulson, Cory T. Overton, David E. Stallknecht, Diann J. Prosser.

**Funding acquisition:** Michael L. Casazza, Rebecca L. Poulson, Michael Derico, David E. Stallknecht, Diann J. Prosser.

**Investigation:** Michael L. Casazza, Rebecca L. Poulson, Cory T. Overton, Mike Carpenter, Austen A. Lorenz, Fiona McDuie, Elizabeth W. Howerth, David E. Stallknecht, Diann J. Prosser.

**Methodology:** Jeffery D. Sullivan, Rebecca L. Poulson, Elliott L. Matchett, Cory T. Overton, Mike Carpenter, Michael Derico, David E. Stallknecht, Diann J. Prosser.

**Project administration:** Jeffery D. Sullivan, Michael L. Casazza, Rebecca L. Poulson, Elliott L. Matchett, Cory T. Overton, Michael Derico, David E. Stallknecht, Diann J. Prosser.

**Resources:** Rebecca L. Poulson, Michael Derico, David E. Stallknecht, Diann J. Prosser.

**Supervision:** Michael L. Casazza, Rebecca L. Poulson, Diann J. Prosser.

**Validation:** Jeffery D. Sullivan.

**Visualization:** Austen A. Lorenz.

**Writing – original draft:** Jeffery D. Sullivan, Diann J. Prosser.

**Writing – review & editing:** Jeffery D. Sullivan, Michael L. Casazza, Rebecca L. Poulson, Elliott L. Matchett, Cory T. Overton, Mike Carpenter, Austen A. Lorenz, Fiona McDuie, Michael Derico, Elizabeth W. Howerth, David E. Stallknecht, Diann J. Prosser.

## References

1. Prosser DJ, Chen J, Ahlstrom CA, Reeves AB, Poulson RL, Sullivan JD, et al. Maintenance and dissemination of avian-origin influenza A virus within the northern Atlantic Flyway of North America. *PLoS Pathog.* 2022;18(6):e1010605. <https://doi.org/10.1371/journal.ppat.1010605> PMID: 35666770
2. Hill NJ, Takekawa JY, Cardona CJ, Meixell BW, Ackerman JT, Runstadler JA, et al. Cross-seasonal patterns of avian influenza virus in breeding and wintering migratory birds: a flyway perspective. *Vector Borne Zoonotic Dis.* 2012;12(3):243–53. <https://doi.org/10.1089/vbz.2010.0246> PMID: 21995264
3. Lam TT-Y, Ip HS, Ghedin E, Wentworth DE, Halpin RA, Stockwell TB, et al. Migratory flyway and geographical distance are barriers to the gene flow of influenza virus among North American birds. *Ecol Lett.* 2012;15(1):24–33. <https://doi.org/10.1111/j.1461-0248.2011.01703.x> PMID: 22008513
4. Fourment M, Darling AE, Holmes EC. The impact of migratory flyways on the spread of avian influenza virus in North America. *BMC Evol Biol.* 2017;17(1):118. <https://doi.org/10.1186/s12862-017-0965-4> PMID: 28545432
5. Caliendo V, Lewis NS, Pohlmann A, Baillie SR, Banyard AC, Beer M, et al. Transatlantic spread of highly pathogenic avian influenza H5N1 by wild birds from Europe to North America in 2021. *Cold Spring Harbor Laboratory.* 2022. <https://doi.org/10.1101/2022.01.13.476155>
6. Hill NJ, Bishop MA, Trovão NS, Ineson KM, Schaefer AL, Puryear WB, et al. Ecological divergence of wild birds drives avian influenza spillover and global spread. *PLoS Pathog.* 2022;18(5):e1010062. <https://doi.org/10.1371/journal.ppat.1010062> PMID: 35588106
7. Kent CM, Ramy AM, Ackerman JT, Bahl J, Bevins SN, Bowman AS, et al. Spatiotemporal changes in influenza A virus prevalence among wild waterfowl inhabiting the continental United States throughout the annual cycle. *Sci Rep.* 2022;12.
8. Bevins SN, Pedersen K, Lutman MW, Baroch JA, Schmit BS, Kohler D, et al. Large-scale avian influenza surveillance in wild birds throughout the United States. *PLoS One.* 2014;9(8):e104360. <https://doi.org/10.1371/journal.pone.0104360> PMID: 25116079



9. Pantin-Jackwood MJ, Swayne DE. Pathogenesis and pathobiology of avian influenza virus infection in birds. *Rev Sci Tech*. 2009;28(1):113–36. <https://doi.org/10.20506/rst.28.1.1869> PMID: 19618622
10. Lee D-H, Criado MF, Swayne DE. Pathobiological origins and evolutionary history of highly pathogenic avian influenza viruses. *Cold Spring Harb Perspect Med*. 2021;11(2):a038679. <https://doi.org/10.1101/cshperspect.a038679> PMID: 31964650
11. Diskin ER, Friedman K, Krauss S, Nolting JM, Poulson RL, Slemons RD, et al. Subtype diversity of influenza A virus in north american waterfowl: a multidecade study. *J Virol*. 2020;94(11):e02022–19. <https://doi.org/10.1128/JVI.02022-19> PMID: 32188732
12. Teitelbaum CS, Casazza ML, McDuire F, De La Cruz SEW, Overton CT, Hall LA, et al. Waterfowl recently infected with low pathogenic avian influenza exhibit reduced local movement and delayed migration. *Ecosphere*. 2023;14(2). <https://doi.org/10.1002/ecs2.4432>
13. Bengtsson D, Safi K, Avril A, Fiedler W, Wikelski M, Gunnarsson G, et al. Does influenza A virus infection affect movement behaviour during stop-over in its wild reservoir host? *R Soc Open Sci*. 2016;3(2):150633. <https://doi.org/10.1098/rsos.150633> PMID: 26998334
14. van Gils JA, Munster VJ, Radersma R, Liefhebber D, Fouchier RAM, Klaassen M. Hampered foraging and migratory performance in swans infected with low-pathogenic avian influenza A virus. *PLoS One*. 2007;2(1):e184. <https://doi.org/10.1371/journal.pone.0000184> PMID: 17264886
15. Hoye BJ, Munster VJ, Huig N, de Vries P, Oosterbeek K, Tijssen W, et al. Hampered performance of migratory swans: intra- and inter-seasonal effects of avian influenza virus. *Integr Comp Biol*. 2016;56(2):317–29. <https://doi.org/10.1093/icb/icw038> PMID: 27252210
16. Teitelbaum CS, Mastro NM, Sullivan JD, Keever AC, Poulson RL, Carter DL, et al. North American wintering mallards infected with highly pathogenic avian influenza show few signs of altered local or migratory movements. *Sci Rep*. 2023;13(1):14473. <https://doi.org/10.1038/s41598-023-40921-z> PMID: 37660131
17. Gaidet N, Cattoli G, Hammoumi S, Newman SH, Hagemeijer W, Takekawa JY, et al. Evidence of infection by H5N2 highly pathogenic avian influenza viruses in healthy wild waterfowl. *PLoS Pathog*. 2008;4(8):e1000127. <https://doi.org/10.1371/journal.ppat.1000127> PMID: 18704172
18. Yoo D-S, Kang S-I, Lee Y-N, Lee E-K, Kim W-Y, Lee Y-J. Bridging the local persistence and long-range dispersal of Highly Pathogenic Avian Influenza Virus (HPAIV): a case study of HPAIV-infected sedentary and migratory wildfowls inhabiting infected premises. *Viruses*. 2022;14(1):116. <https://doi.org/10.3390/v14010116> PMID: 35062320
19. Prosser DJ, Schley HL, Simmons N, Sullivan JD, Homyack J, Weegman M, et al. A lesser scaup (*Aythya affinis*) naturally infected with Eurasian 2.3.4.4 highly pathogenic H5N1 avian influenza virus: Movement ecology and host factors. *Transbound Emerg Dis*. 2022;69(5):e2653–60. <https://doi.org/10.1111/tbed.14614> PMID: 35678746
20. Shriner SA, Root JJ, Ellis JW, Bentler KT, VanDalen KK, Gidlewski T, et al. Influenza A virus surveillance, infection and antibody persistence in snow geese (*Anser caerulescens*). *Transbound Emerg Dis*. 2022;69(2):742–52. <https://doi.org/10.1111/tbed.14044> PMID: 33621417
21. U.S. Geological Survey. Wildlife Health Information Sharing Partnership: Event Reporting System. 2024.
22. USDA. 2022–2025 Detections of Highly Pathogenic Avian Influenza in Wild Birds. Available from: <https://www.aphis.usda.gov/aphis/ourfocus/animalhealth/animal-disease-information/avian/avian-influenza/hpai-2022/2022-hpai-wild-birds>. 2025.
23. Mlodinow SG, Mowbray TB, Cooke F, Ganter B. Snow Goose (*Anser caerulescens*), version 2.0. In: Rodewald PG, Sly ND, editors. *Birds of the World*. Ithaca, NY: Cornell Lab of Ornithology. 2024.
24. Schemnitz SD, Batcheller GR, Lavallo MJ, White HB, Fall MW. Capturing and handling wild animals. In: Silvy NJ, editor. *The wildlife techniques manual*. Baltimore: Johns Hopkins University Press. 2009. p. 232–69.
25. Brown JD, Stallknecht DE, Beck JR, Suarez DL, Swayne DE. Susceptibility of North American ducks and gulls to H5N1 highly pathogenic avian influenza viruses. *Emerg Infect Dis*. 2006;12(11):1663–70. <https://doi.org/10.3201/eid1211.060652>
26. Ip HS, Dusek RJ, Heisey DM. The effect of swab sample choice on the detection of avian influenza in apparently healthy wild ducks. *Avian Dis*. 2012;56(1):114–9. <https://doi.org/10.1637/9832-061311-Reg.1> PMID: 22545536
27. Drewien RC, Clegg KR. Capturing whooping cranes and sandhill cranes by night-lighting. In: *Proceedings of the 6th North American Crane Workshop*, University of Nebraska: Lincoln;1992. 43–9.
28. Dill HH, Thornsberry WH. A Cannon-Projected Net Trap for Capturing Waterfowl. *The Journal of Wildlife Management*. 1950;14(2):132. <https://doi.org/10.2307/3796320>
29. Spackman E, Senne DA, Myers TJ, Bulaga LL, Garber LP, Perdue ML, et al. Development of a real-time reverse transcriptase PCR assay for type A influenza virus and the avian H5 and H7 hemagglutinin subtypes. *J Clin Microbiol*. 2002;40(9):3256–60. <https://doi.org/10.1128/JCM.40.9.3256-3260.2002> PMID: 12202562
30. Arruda B, Baker ALV, Buckley A, Anderson TK, Torchetti M, Bergeson NH, et al. Divergent Pathogenesis and Transmission of Highly Pathogenic Avian Influenza A(H5N1) in Swine. *Emerg Infect Dis*. 2024;30(4):738–51. <https://doi.org/10.3201/eid3004.231141> PMID: 38478379
31. Tolf C, Latorre-Margalef N, Wille M, Bengtsson D, Gunnarsson G, Grosbois V, et al. Individual variation in influenza A virus infection histories and long-term immune responses in Mallards. *PLoS One*. 2013;8(4):e61201. <https://doi.org/10.1371/journal.pone.0061201> PMID: 23637797
32. Brown JD, Stallknecht DE, Berghaus RD, Luttrell MP, Velek K, Kistler W, et al. Evaluation of a commercial blocking enzyme-linked immunosorbent assay to detect avian influenza virus antibodies in multiple experimentally infected avian species. *Clin Vaccine Immunol*. 2009;16(6):824–9. <https://doi.org/10.1128/CI.00084-09> PMID: 19386796
33. Shriner SA, VanDalen KK, Root JJ, Sullivan HJ. Evaluation and optimization of a commercial blocking ELISA for detecting antibodies to influenza A virus for research and surveillance of mallards. *J Virol Methods*. 2016;228:130–4. <https://doi.org/10.1016/j.jviromet.2015.11.021> PMID: 26645952

34. Stallknecht DE, Fojtik A, Carter DL, Crum-Bradley JA, Perez DR, Poulson RL. Naturally acquired antibodies to influenza A virus in fall-migrating North American mallards. *Vet Sci*. 2022;9(5):214. <https://doi.org/10.3390/vetsci9050214> PMID: 35622742
35. Stallknecht DE, Kienzle-Dean C, Davis-Fields N, Jennelle CS, Bowman AS, Nolting JM, et al. Limited detection of antibodies to clade 2.3.4.4 a/goose/guangdong/1/1996 lineage highly pathogenic h5 avian influenza virus in North American waterfowl. *J Wildl Dis*. 2020;56(1):47–57. PMID: 31556839
36. R Development Core Team. R: A language and environment for statistical computing. R Foundation for Statistical Computing: Vienna, Austria. <http://www.R-project.org/> 2012.
37. Wong JK, Wilcox BR, Fojtik A, Poulson RL, Stallknecht DE. Antibodies to influenza A viruses in wintering snow geese (*Chen caerulescens*) in Texas. *Avian Dis*. 2016;60(1 Suppl):337–40. <https://doi.org/10.1637/11104-042115-RegR> PMID: 27309076
38. Newman SH, Hill NJ, Spragens KA, Janies D, Voronkin IO, Prosser DJ, et al. Eco-virological approach for assessing the role of wild birds in the spread of avian influenza H5N1 along the Central Asian Flyway. *PLoS One*. 2012;7(2):e30636. <https://doi.org/10.1371/journal.pone.0030636> PMID: 22347393
39. Brown JD, Stallknecht DE, Swayne DE. Experimental infection of swans and geese with highly pathogenic avian influenza virus (H5N1) of Asian lineage. *Emerg Infect Dis*. 2008;14(1):136–42. <https://doi.org/10.3201/eid1401.070740> PMID: 18258093
40. Spackman E, Pantin-Jackwood MJ, Lee SA, Prosser D. The pathogenesis of a 2022 North American highly pathogenic clade 2.3.4.4b H5N1 avian influenza virus in mallards (*Anas platyrhynchos*). *Avian Pathol*. 2023;52(3):219–28. <https://doi.org/10.1080/03079457.2023.2196258> PMID: 36999798
41. R Core Team. R: A language and environment for statistical computing. Vienna: R Foundation for Statistical Computing. 2021.
42. Hijmans. Geosphere: Spherical Trigonometry. 2021.
43. Calenge C. The package “adehabitat” for the R software: A tool for the analysis of space and habitat use by animals. *Ecological Modelling*. 2006;197(3–4):516–9. <https://doi.org/10.1016/j.ecolmodel.2006.03.017>
44. ArcMap 10.8.1. Redlands, California: ESRI. 2021.
45. Sullivan JD, Takekawa JY, Spragens KA, Newman SH, Xiao X, Leader PJ, et al. Waterfowl spring migratory behavior and avian influenza transmission risk in the changing landscape of the East Asian-Australasian flyway. *Front Ecol Evol*. 2018;6. <https://doi.org/10.3389/fevo.2018.00206>
46. Ely CR, Bollinger KS, Densmore RV, Rothe TC, Petrula MJ, Takekawa JY. Reproductive strategies of Northern geese: Why wait? *Auk*. 2007;124:594–605.
47. Sullivan JD, Casazza ML, Poulson RL, Matchett EL, Overton CT, Carpenter M. Data supporting work to understand the impacts of 2.3.4.4b highly pathogenic H5N1 avian influenza virus infection on Snow Goose movement ecology. 2025. <https://doi.org/10.5066/P13VCREZ>
48. National Snow and Ice Data Center. The new abnormal. Sea Ice Today News Release. 2024.
49. Caliendo V, Leijten L, van de Bildt MWG, Poen MJ, Kok A, Bestebroer T, et al. Long-term protective effect of serial infections with H5N8 highly pathogenic avian influenza virus in wild ducks. *J Virol*. 2022;96(18):e0123322. <https://doi.org/10.1128/jvi.01233-22> PMID: 36098512
50. Samuel MD, Hall JS, Brown JD, Goldberg DR, Ip H, Baranyuk VV. The dynamics of avian influenza in Lesser Snow Geese: implications for annual and migratory infection patterns. *Ecol Appl*. 2015;25(7):1851–9. <https://doi.org/10.1890/14-1820.1>
51. Kandeil A, Patton C, Jones JC, Jeevan T, Harrington WN, Trifkovic S, et al. Rapid evolution of A(H5N1) influenza viruses after intercontinental spread to North America. *Nat Commun*. 2023;14(1):3082. <https://doi.org/10.1038/s41467-023-38415-7> PMID: 37248261
52. Teitelbaum CS, Ackerman JT, Hill MA, Satter JM, Casazza ML, De La Cruz SEW, et al. Avian influenza antibody prevalence increases with mercury contamination in wild waterfowl. *Proc Biol Sci*. 2022;289(1982):20221312. <https://doi.org/10.1098/rspb.2022.1312> PMID: 36069010
53. Hénau V, Samuel MD, Bunck CM. Model-based evaluation of highly and low pathogenic avian influenza dynamics in wild birds. *PLoS One*. 2010;5(6):e10997. <https://doi.org/10.1371/journal.pone.0010997> PMID: 20585637
54. Gaidet N, Cappelle J, Takekawa JY, Prosser DJ, Iverson SA, Douglas DC, et al. Potential spread of highly pathogenic avian influenza H5N1 by wildfowl: dispersal ranges and rates determined from large-scale satellite telemetry. *J Appl Ecol*. 2010;47(5):1147–57. <https://doi.org/10.1111/j.1365-2664.2010.01845.x>
55. Kim H-R, Kwon Y-K, Jang I, Lee Y-J, Kang H-M, Lee E-K, et al. Pathologic changes in wild birds infected with Highly Pathogenic Avian Influenza A(H5N8) Viruses, South Korea, 2014. *Emerg Infect Dis*. 2015;21(5):775–80. <https://doi.org/10.3201/eid2105.141967> PMID: 25897841
56. Bröjer C, Agren EO, Uhlhorn H, Bernodt K, Jansson DS, Gavier-Widén D. Characterization of encephalitis in wild birds naturally infected by highly pathogenic avian influenza H5N1. *Avian Dis*. 2012;56(1):144–52. <https://doi.org/10.1637/9826-060111-Reg.1> PMID: 22545540
57. Latorre-Margalef N, Gunnarsson G, Munster VJ, Fouchier RAM, Osterhaus ADME, Elmberg J, et al. Effects of influenza A virus infection on migrating mallard ducks. *Proc Biol Sci*. 2009;276(1659):1029–36. <https://doi.org/10.1098/rspb.2008.1501> PMID: 19129127
58. Kuiken T. Is low pathogenic avian influenza virus virulent for wild waterbirds? *Proc Biol Sci*. 2013;280(1763):20130990. <https://doi.org/10.1098/rspb.2013.0990> PMID: 23740783
59. Latorre-Margalef N, Gunnarsson G, Munster VJ, Fouchier RAM, Osterhaus ADME, Elmberg J, et al. Does influenza A affect body condition of wild mallard ducks, or vice versa ? A reply to Flint and Franson. *Proc R Soc B*. 2009;276(1666):2347–9. <https://doi.org/10.1098/rspb.2009.0275>
60. Latorre-Margalef N, Gunnarsson G, Munster VJ, Fouchier RAM, Osterhaus ADME, Elmberg J, et al. Does influenza A affect body condition of wild mallard ducks, or vice versa ? A reply to Flint and Franson. *Proc R Soc B*. 2009;276(1666):2347–9. <https://doi.org/10.1098/rspb.2009.0275>
